# Supplementary material
Source: HighWire-hosted journal article supplement (https://ard.bmj.com/content/80/6/775)
Supplement: inline-supplementary-material-2 [file inline-supplementary-material-2.pdf]

**Supplementary Table 2.** Sensitivity and Specificity of SLE Classification Criteria

| Criterion                    | Sensitivity |                          | Specificity |                          |
|------------------------------|-------------|--------------------------|-------------|--------------------------|
|                              |             | 95% confidence intervals |             | 95% confidence intervals |
| ANA (entry criterion)        | 99.50%      | 98.91 – 99.82%           | 19.37%      | 17.04 – 21.86%           |
| Fever                        | 14.79%      | 12.82 – 16.93%           | 95.25%      | 93.80 – 96.44%           |
| Leucopenia                   | 47.95%      | 45.09 – 50.83%           | 83.80%      | 81.46 – 85.95%           |
| Thrombocytopenia             | 15.87%      | 13.85 – 18.07%           | 95.90%      | 94.54 – 97.01%           |
| Autoimmune hemolysis         | 4.43%       | 3.33 – 5.75%             | 99.91%      | 99.48 – 100.00%          |
| Delirium                     | 0.42%       | 0.00 – 0.97%             | 100.00%     | 99.66 – 100.00%          |
| Psychosis                    | 1.84%       | 1.16 – 2.77%             | 100.00%     | 99.66 – 100.00%          |
| Seizure                      | 5.01%       | 3.85 – 6.41%             | 99.26%      | 98.54 – 99.68%           |
| Alopecia                     | 35.51%      | 32.79 – 38.29%           | 94.13%      | 92.56 – 95.46%           |
| Oral ulcers                  | 26.98%      | 24.49 – 29.59%           | 93.02%      | 91.32 – 94.47%           |
| Discoid LE                   | 8.35%       | 6.85 – 10.07%            | 99.72%      | 99.19 – 99.94%           |
| SCLE                         | 10.94%      | 9.23 – 12.85%            | 99.72%      | 99.19 – 99.94%           |
| ACLE                         | 42.77%      | 39.95 – 45.63%           | 98.88%      | 98.06 – 99.42%           |
| Pleural/pericardial effusion | 16.04%      | 14.01 – 18.24%           | 96.83%      | 95.60 – 97.80%           |
| Acute pericarditis           | 5.10%       | 3.92 – 6.50%             | 98.98%      | 98.17 – 99.49%           |
| Joint involvement            | 72.01%      | 69.38 – 74.54%           | 90.88%      | 88.99 – 92.53%           |
| Proteinuria                  | 33.25%      | 30.58 – 36.00%           | 98.98%      | 98.17 – 99.49%           |
| Class II/V nephritis         | 10.36%      | 8.69 – 12.23%            | 99.81%      | 99.33 – 99.98%           |
| Class III/IV nephritis       | 21.89%      | 19.58 – 24.34%           | 99.91%      | 99.48 – 100.00%          |
| Antiphospholipid antibody    | 26.32%      | 23.84 – 28.91%           | 87.71%      | 85.60 – 89.61%           |
| C3 or C4 low                 | 71.68%      | 69.03 – 74.22%           | 82.96%      | 80.58 – 85.16%           |
| C3 and C4 low                | 46.28%      | 43.43 – 49.16%           | 95.53%      | 94.12 – 96.69%           |
| Anti-dsDNA antibody          | 75.61%      | 73.07 – 78.02%           | 93.67%      | 92.04 – 95.05%           |
